# Supplementary material for: Combined detection of hepatitis B virus surface antigen and hepatitis B virus DNA using a DNA sensor
Source: Royal Society of Chemistry journal article supplement (doi:10.1039/d4ay01629g), 2024-01-01
Supplement: d4ay01629g1.pdf [file d4ay01629g1.pdf]

## Supplementary Information (SI)

### Combined Detection of Hepatitis B Virus Surface Antigen and Hepatitis B Virus DNA using DNA sensor

Hang Gong,<sup>\*a</sup> Shufen Yao<sup>b</sup>, Yong Li,<sup>\*c</sup> Chunyan Chen,<sup>b</sup> Feng Chen<sup>b</sup> and Changqun Cai<sup>\*b</sup>

a. Yunnan Key Laboratory of Modern Separation Analysis and Substance Transformation, College of Chemistry and Chemical Engineering, Yunnan Normal University, Kunming, 650500, P. R. China.

b. Key Laboratory for Green Organic Synthesis and Application of Hunan Province, Xiangtan University, Xiangtan 411105, China.

c. Yunnan academy of tobacco agricultural sciences, Kunming, 650021, China.

\*: corresponding author

Hang Gong: hgong@xtu.edu.cn

Changqun Cai: ccq@xtu.edu.cn

Yong Li: liyong189108@163.com

## Material

The oligonucleotides were ordered from Shanghai Sangon Co., Ltd. (Shanghai, China). ThT was supplied by J&K Scientific Co., Ltd. (Beijing, China). Water (18.2 M) was supplied from an ultrapure water system. The sequences of the oligonucleotides were listed in **Table S1**.

**Table S1.** Nucleic acid sequence used in the experiment<sup>a</sup>

| Oligomer                      | Sequence (5'-3')                                                                                                     |
|-------------------------------|----------------------------------------------------------------------------------------------------------------------|
| HBV aptamer                   | GGGAATTCGAGCTCGGTACCCACAGCGAACAGCGGCG<br>GACATAATAGTGCTTACTACGACCTGCAGGCATGCAAG<br>CTTGG                             |
| TAMRA-modified DNA<br>(T-DNA) | TAMRA-CACCGCTGTTACTAGTAACATATCAA                                                                                     |
| BHQ2-modified DNA<br>(B-DNA)  | GGCATGCAAGCTTGGTAACAGCG-BHQ2                                                                                         |
| Locker (L)                    | TAAGATTAATCCTGTTTGATATGTTACTAGTAACAGCGC<br>TGTTACCAAGCTTGCATGCCTGCAGGTCGTAGTA<br>TTGGGTATAAAGACTGGTAAATTGCTCATCCATGC |
| S1                            | CTAGACTGGCGATAAGTAGCCAGC                                                                                             |
| S2                            | CTGCTGATTATTCTAGCTCAGCAAGCGTTATGCGT<br>CTAGGCATGGATGAGC                                                              |
| S3                            | AATTTACCAGTCTTTATACCCAAGCTCTGGTATGC<br>ATGTCGGCATAACGCTTGCTGAGC                                                      |
| S4                            | ACAGGATTAATCTTAGCTGGCTACTTATCGCCACG<br>ACATGCATACCAGAGC                                                              |
| Ha                            | TAGAATAATCAGCAGTACCACCCATTAATGTGCTCCCC<br>CAACTCCTCTAAGTCACATTAATGGGTGGGTGGGTGGG                                     |
| Hb                            | TAAGATTAATCCTGTTTAATGTGACTTAGAGGAGTTGG<br>GGGAGCACATTAATGGCCCCAACTCCTCTAAGT                                          |
| HBV DNA                       | GAGGAGTTGGGGGAGCACATT                                                                                                |
| Double-base mismatch (DM)     | GAGGAGTTG <u>C</u> GGGAGC <u>T</u> CATT                                                                              |
| Three-base mismatch (TM)      | GAC <u>G</u> AGTTG <u>C</u> GGGAGC <u>T</u> CATT                                                                     |
| Non-complementary (NC)        | AAAAGGTGTAAGCGTTTGCCG                                                                                                |

<sup>a</sup> Bases underlined in the table indicate mismatched bases
